# Supplementary material for: Systems Biology and Chemoinformatics‐Based Strategies to Explore the Biological Mechanism of Fugui Wenyang Decoction in Treating Vascular Dementia Rats
Source: Hindawi journal article supplement (doi:10.1155/2021/6693955), 2021-01-01
Supplement: f3 [file 6693955.f3.pdf]

**Table S3 Biological Processes of FGWYD-VD PPI Network**

| Cluster | Term       | Pathway                                   | Count | %        | Pvalue   |
|---------|------------|-------------------------------------------|-------|----------|----------|
| 1       | GO:0043066 | negative regulation of apoptotic proce    | 21    | 36.84211 | 9.18E-18 |
|         | GO:0006954 | inflammatory response                     | 17    | 29.82456 | 6.06E-14 |
|         | GO:0007568 | aging                                     | 12    | 21.05263 | 5.99E-12 |
|         | GO:0001666 | response to hypoxia                       | 11    | 19.29825 | 2.32E-10 |
|         | GO:0051092 | positive regulation of NF-kappaB tran     | 10    | 17.54386 | 5.16E-10 |
|         | GO:0071456 | cellular response to hypoxia              | 9     | 15.78947 | 9.62E-10 |
|         | GO:0001525 | angiogenesis                              | 11    | 19.29825 | 2.91E-09 |
|         | GO:0008284 | positive regulation of cell proliferation | 14    | 24.5614  | 3.12E-09 |
|         | GO:0043065 | positive regulation of apoptotic proce    | 10    | 17.54386 | 5.97E-07 |
|         | GO:0034097 | response to cytokine                      | 6     | 10.52632 | 7.93E-07 |
|         | GO:0043524 | negative regulation of neuron apoptoti    | 7     | 12.2807  | 4.95E-06 |
|         | GO:0042542 | response to hydrogen peroxide             | 5     | 8.77193  | 2.47E-05 |
|         | GO:0006979 | response to oxidative stress              | 6     | 10.52632 | 3.22E-05 |
|         | GO:0043536 | positive regulation of blood vessel enc   | 4     | 7.017544 | 3.28E-05 |
|         | GO:0042127 | regulation of cell proliferation          | 7     | 12.2807  | 3.39E-05 |
|         | GO:0045766 | positive regulation of angiogenesis       | 6     | 10.52632 | 3.99E-05 |
|         | GO:0050679 | positive regulation of epithelial cell pr | 5     | 8.77193  | 4.71E-05 |
|         | GO:0035924 | cellular response to vascular endotheli   | 4     | 7.017544 | 5.93E-05 |
|         | GO:0071677 | positive regulation of mononuclear ce     | 3     | 5.263158 | 6.53E-05 |
|         | GO:0001938 | positive regulation of endothelial cell   | 5     | 8.77193  | 8.16E-05 |
|         | GO:0050729 | positive regulation of inflammatory re    | 5     | 8.77193  | 1.02E-04 |
|         | GO:2000352 | negative regulation of endothelial cell   | 4     | 7.017544 | 1.08E-04 |
|         | GO:0045907 | positive regulation of vasoconstrictor    | 4     | 7.017544 | 1.63E-04 |
|         | GO:0006919 | activation of cysteine-type endopeptid    | 5     | 8.77193  | 1.68E-04 |
|         | GO:0043123 | positive regulation of I-kappaB kinase    | 6     | 10.52632 | 1.96E-04 |
|         | GO:0032930 | positive regulation of superoxide anio    | 3     | 5.263158 | 3.87E-04 |
|         | GO:0043525 | positive regulation of neuron apoptoti    | 4     | 7.017544 | 3.94E-04 |
|         | GO:0030168 | platelet activation                       | 5     | 8.77193  | 5.83E-04 |
|         | GO:0090026 | positive regulation of monocyte chem      | 3     | 5.263158 | 0.001272 |
|         | GO:0030949 | positive regulation of vascular endothe   | 3     | 5.263158 | 0.001272 |
|         | GO:0043066 | negative regulation of apoptotic proce    | 11    | 23.91304 | 2.64E-07 |
|         | GO:0045766 | positive regulation of angiogenesis       | 6     | 13.04348 | 1.36E-05 |
|         | GO:0006986 | response to unfolded protein              | 4     | 8.695652 | 1.92E-04 |
|         | GO:0050999 | regulation of nitric-oxide synthase act   | 3     | 6.521739 | 0.002191 |
|         | GO:0006366 | transcription from RNA polymerase II      | 7     | 15.21739 | 0.002339 |
|         | GO:0006954 | inflammatory response                     | 6     | 13.04348 | 0.00332  |
|         | GO:0051402 | neuron apoptotic process                  | 3     | 6.521739 | 0.003517 |
|         | GO:0030968 | endoplasmic reticulum unfolded prote      | 3     | 6.521739 | 0.006461 |
|         | GO:0001666 | response to hypoxia                       | 4     | 8.695652 | 0.010936 |
|         | GO:0050727 | regulation of inflammatory response       | 3     | 6.521739 | 0.012364 |
|         | GO:0030512 | negative regulation of transforming gr    | 3     | 6.521739 | 0.012741 |
|         | GO:0038033 | positive regulation of endothelial cell   | 2     | 4.347826 | 0.013329 |
|         | GO:2001028 | positive regulation of endothelial cell   | 2     | 4.347826 | 0.013329 |

|          |                                                    |   |          |          |
|----------|----------------------------------------------------|---|----------|----------|
|          | GO:0045454 cell redox homeostasis                  | 3 | 6.521739 | 0.018091 |
|          | GO:0071639 positive regulation of monocyte chem    | 2 | 4.347826 | 0.018612 |
|          | GO:1903071 positive regulation of ER-associated u  | 2 | 4.347826 | 0.021243 |
|          | GO:0071456 cellular response to hypoxia            | 3 | 6.521739 | 0.027306 |
|          | GO:1902176 negative regulation of oxidative stress | 2 | 4.347826 | 0.036885 |
|          | GO:0043536 positive regulation of blood vessel enc | 2 | 4.347826 | 0.049734 |
|          | GO:2000352 negative regulation of endothelial cell | 2 | 4.347826 | 0.072439 |
|          | GO:0001937 negative regulation of endothelial cell | 2 | 4.347826 | 0.074929 |
| <b>2</b> | GO:0043542 endothelial cell migration              | 2 | 4.347826 | 0.074929 |
|          | GO:0006940 regulation of smooth muscle contracti   | 4 | 25       | 3.21E-07 |
|          | GO:0071880 adenylate cyclase-activating adrenergi  | 4 | 25       | 5.54E-07 |
|          | GO:0071883 activation of MAPK activity by adren    | 3 | 18.75    | 4.46E-06 |
|          | GO:0032811 negative regulation of epinephrine sec  | 3 | 18.75    | 4.46E-06 |
|          | GO:0035625 epidermal growth factor-activated rec   | 3 | 18.75    | 4.46E-06 |
|          | GO:0007186 G-protein coupled receptor signaling p  | 8 | 50       | 5.43E-06 |
|          | GO:0007187 G-protein coupled receptor signaling p  | 4 | 25       | 8.55E-06 |
|          | GO:0010700 negative regulation of norepinephrine   | 3 | 18.75    | 1.56E-05 |
|          | GO:0007200 phospholipase C-activating G-protein    | 4 | 25       | 2.55E-05 |
|          | GO:0019229 regulation of vasoconstriction          | 3 | 18.75    | 1.40E-04 |
|          | GO:0007268 chemical synaptic transmission          | 4 | 25       | 0.001155 |
|          | GO:0007198 adenylate cyclase-inhibiting serotonin  | 2 | 12.5     | 0.002678 |
|          | GO:0007218 neuropeptide signaling pathway          | 3 | 18.75    | 0.003574 |
|          | GO:0030168 platelet activation                     | 3 | 18.75    | 0.004606 |
|          | GO:0051967 negative regulation of synaptic transm  | 2 | 12.5     | 0.008013 |
|          | GO:0050795 regulation of behavior                  | 2 | 12.5     | 0.008013 |
|          | GO:0007399 nervous system development              | 3 | 18.75    | 0.026397 |
| <b>3</b> | GO:0007271 synaptic transmission, cholinergic      | 2 | 12.5     | 0.03256  |
|          | GO:0001994 norepinephrine-epinephrine vasoconst    | 3 | 14.28571 | 8.07E-06 |
|          | GO:0007271 synaptic transmission, cholinergic      | 4 | 19.04762 | 1.09E-05 |
|          | GO:0008283 cell proliferation                      | 6 | 28.57143 | 5.67E-05 |
|          | GO:0060079 excitatory postsynaptic potential       | 3 | 14.28571 | 5.00E-04 |
|          | GO:0042135 neurotransmitter catabolic process      | 2 | 9.52381  | 0.009491 |
|          | GO:0050804 modulation of synaptic transmission     | 2 | 9.52381  | 0.020065 |
|          | GO:0048169 regulation of long-term neuronal syna   | 2 | 9.52381  | 0.021234 |
|          | GO:0055114 oxidation-reduction process             | 4 | 19.04762 | 0.031803 |
| <b>4</b> | GO:0007268 chemical synaptic transmission          | 3 | 14.28571 | 0.032636 |
|          | GO:0006750 glutathione biosynthetic process        | 3 | 37.5     | 1.78E-05 |
|          | GO:1901687 glutathione derivative biosynthetic pro | 3 | 37.5     | 3.43E-05 |
|          | GO:2001237 negative regulation of extrinsic apopto | 3 | 37.5     | 1.04E-04 |
|          | GO:0006749 glutathione metabolic process           | 3 | 37.5     | 2.27E-04 |
|          | GO:0097069 cellular response to thyroxine stimulu  | 2 | 25       | 8.34E-04 |
|          | GO:0006979 response to oxidative stress            | 3 | 37.5     | 8.74E-04 |
|          | GO:0051409 response to nitrosative stress          | 2 | 25       | 0.001667 |

|   |                                                     |   |          |          |
|---|-----------------------------------------------------|---|----------|----------|
| 5 | GO:0018916 nitrobenzene metabolic process           | 2 | 25       | 0.001667 |
|   | GO:0051900 regulation of mitochondrial depolariza   | 2 | 25       | 0.001667 |
|   | GO:0007568 aging                                    | 3 | 37.5     | 0.001951 |
|   | GO:0008152 metabolic process                        | 3 | 37.5     | 0.002022 |
| 6 | GO:1902476 chloride transmembrane transport         | 4 | 50       | 5.66E-06 |
|   | GO:0007214 gamma-aminobutyric acid signaling p      | 3 | 37.5     | 3.43E-05 |
|   | GO:0034220 ion transmembrane transport              | 4 | 50       | 6.50E-05 |
|   | GO:0007165 signal transduction                      | 4 | 50       | 0.009342 |
|   | GO:0006821 chloride transport                       | 2 | 25       | 0.016559 |
|   | GO:0043524 negative regulation of neuron apoptoti   | 2 | 25       | 0.053755 |
| 7 | GO:0007268 chemical synaptic transmission           | 2 | 25       | 0.095875 |
|   | GO:0007268 chemical synaptic transmission           | 5 | 55.55556 | 2.72E-06 |
|   | GO:0015844 monoamine transport                      | 3 | 33.33333 | 5.55E-06 |
|   | GO:0042493 response to drug                         | 5 | 55.55556 | 6.96E-06 |
|   | GO:0045471 response to ethanol                      | 3 | 33.33333 | 0.001058 |
|   | GO:0051583 dopamine uptake involved in synaptic     | 2 | 22.22222 | 0.00238  |
|   | GO:0055085 transmembrane transport                  | 3 | 33.33333 | 0.005558 |
|   | GO:0042136 neurotransmitter biosynthetic process    | 2 | 22.22222 | 0.005704 |
|   | GO:0048265 response to pain                         | 2 | 22.22222 | 0.008072 |
|   | GO:0051412 response to corticosterone               | 2 | 22.22222 | 0.008545 |
|   | GO:0001975 response to amphetamine                  | 2 | 22.22222 | 0.014677 |
|   | GO:0007611 learning or memory                       | 2 | 22.22222 | 0.017026 |
|   | GO:0035094 response to nicotine                     | 2 | 22.22222 | 0.017496 |
|   | GO:0060291 long-term synaptic potentiation          | 2 | 22.22222 | 0.017965 |
|   | GO:0019233 sensory perception of pain               | 2 | 22.22222 | 0.024512 |
|   | GO:0007613 memory                                   | 2 | 22.22222 | 0.029165 |
|   | GO:0007626 locomotory behavior                      | 2 | 22.22222 | 0.039333 |
|   | GO:0001666 response to hypoxia                      | 2 | 22.22222 | 0.079081 |
|   | GO:0007190 activation of adenylate cyclase activit  | 4 | 50       | 4.35E-07 |
|   | GO:0007189 adenylate cyclase-activating G-protein   | 3 | 37.5     | 1.81E-04 |
|   | GO:0046960 sensitization                            | 2 | 25       | 8.34E-04 |
|   | GO:0002025 vasodilation by norepinephrine-epineph   | 2 | 25       | 0.00125  |
|   | GO:0031649 heat generation                          | 2 | 25       | 0.00125  |
|   | GO:0071870 cellular response to catecholamine sti   | 2 | 25       | 0.002915 |
|   | GO:0002024 diet induced thermogenesis               | 2 | 25       | 0.003746 |
|   | GO:0010579 positive regulation of adenylate cyclase | 2 | 25       | 0.003746 |
|   | GO:0060158 phospholipase C-activating dopamine      | 2 | 25       | 0.004162 |
|   | GO:0040015 negative regulation of multicellular or  | 2 | 25       | 0.004993 |
|   | GO:0007191 adenylate cyclase-activating dopamine    | 2 | 25       | 0.004993 |
|   | GO:0001963 synaptic transmission, dopaminergic      | 2 | 25       | 0.005408 |
|   | GO:0060292 long term synaptic depression            | 2 | 25       | 0.006652 |
|   | GO:0001659 temperature homeostasis                  | 2 | 25       | 0.007895 |
|   | GO:0071880 adenylate cyclase-activating adrenergic  | 2 | 25       | 0.007895 |

|           |                                                          |   |          |          |
|-----------|----------------------------------------------------------|---|----------|----------|
| <b>8</b>  | GO:0019226 transmission of nerve impulse                 | 2 | 25       | 0.008309 |
|           | GO:0046627 negative regulation of insulin receptor       | 2 | 25       | 0.012029 |
|           | GO:0001975 response to amphetamine                       | 2 | 25       | 0.012854 |
|           | GO:0050873 brown fat cell differentiation                | 2 | 25       | 0.013266 |
|           | GO:0009409 response to cold                              | 2 | 25       | 0.014914 |
|           | GO:0030819 positive regulation of cAMP biosynthesis      | 2 | 25       | 0.016559 |
|           | GO:0007612 learning                                      | 2 | 25       | 0.023525 |
|           | GO:0007416 synapse assembly                              | 2 | 25       | 0.025158 |
|           | GO:0006874 cellular calcium ion homeostasis              | 2 | 25       | 0.038137 |
|           | GO:0030168 platelet activation                           | 2 | 25       | 0.046974 |
| <b>9</b>  | GO:0018105 peptidyl-serine phosphorylation               | 2 | 25       | 0.050968 |
|           | GO:0007268 chemical synaptic transmission                | 2 | 25       | 0.095875 |
|           | GO:0032469 endoplasmic reticulum calcium ion homeostasis | 2 | 25       | 0.006237 |
|           | GO:2001234 negative regulation of apoptotic signaling    | 2 | 25       | 0.006652 |
|           | GO:0006509 membrane protein ectodomain proteolysis       | 2 | 25       | 0.009137 |
|           | GO:0051402 neuron apoptotic process                      | 2 | 25       | 0.013678 |
| <b>10</b> | GO:0043066 negative regulation of apoptotic process      | 3 | 37.5     | 0.014056 |
|           | GO:0001764 neuron migration                              | 2 | 25       | 0.042966 |
|           | GO:0008202 steroid metabolic process                     | 4 | 80       | 6.25E-08 |
|           | GO:0042574 retinal metabolic process                     | 3 | 60       | 2.81E-06 |
|           | GO:0008210 estrogen metabolic process                    | 2 | 40       | 0.002618 |
|           | GO:0055114 oxidation-reduction process                   | 3 | 60       | 0.007101 |
| <b>11</b> | GO:0042572 retinol metabolic process                     | 2 | 40       | 0.007128 |
|           | GO:0001523 retinoid metabolic process                    | 2 | 40       | 0.014453 |
|           | GO:0007596 blood coagulation                             | 3 | 100      | 1.19E-04 |
|           | GO:0010544 negative regulation of platelet activation    | 2 | 66.66667 | 9.53E-04 |
| <b>12</b> | GO:0051918 negative regulation of fibrinolysis           | 2 | 66.66667 | 0.001191 |
|           | GO:0042730 fibrinolysis                                  | 2 | 66.66667 | 0.0025   |
|           | GO:0007598 blood coagulation, extrinsic pathway          | 2 | 66.66667 | 5.95E-04 |
|           | GO:0017187 peptidyl-glutamic acid carboxylation          | 2 | 66.66667 | 0.00131  |
|           | GO:0006465 signal peptide processing                     | 2 | 66.66667 | 0.002975 |
|           | GO:0051897 positive regulation of protein kinase B       | 2 | 66.66667 | 0.00998  |
| <b>12</b> | GO:0006888 ER to Golgi vesicle-mediated transport        | 2 | 66.66667 | 0.018966 |
|           | GO:0007596 blood coagulation                             | 2 | 66.66667 | 0.021796 |
|           | GO:0030335 positive regulation of cell migration         | 2 | 66.66667 | 0.021796 |
|           | GO:0019430 removal of superoxide radicals                | 2 | 33.33333 | 0.003568 |
|           | GO:0060291 long-term synaptic potentiation               | 2 | 33.33333 | 0.011265 |
|           | GO:0009636 response to toxic substance                   | 2 | 33.33333 | 0.025058 |
| <b>12</b> | GO:0045471 response to ethanol                           | 2 | 33.33333 | 0.03088  |
|           | GO:0007417 central nervous system development            | 2 | 33.33333 | 0.035228 |
|           | GO:0007605 sensory perception of sound                   | 2 | 33.33333 | 0.038984 |

|           |                                                     |   |          |          |
|-----------|-----------------------------------------------------|---|----------|----------|
| <b>13</b> | GO:0007568 aging                                    | 2 | 33.33333 | 0.04818  |
|           | GO:0043065 positive regulation of apoptotic process | 2 | 33.33333 | 0.086203 |

| Genes                                        | Fold Enrichment | Bonferroni  |
|----------------------------------------------|-----------------|-------------|
| IL10, CDKN1A, NGF, MPO, MMP9, EGFR, IL2, R   | 13.59676113     | 1.39E-14    |
| IL10, CRP, CD40, TGFB1, CXCL8, FOS, PTGS2, T | 13.21409064     | 9.21E-11    |
| IL10, CASP9, IL6, JUN, TGFB1, VCAM1, CAT, CC | 21.42519936     | 9.10E-09    |
| TGFB1, VCAM1, NOS2, PLA2, CASP3, MMP2, C     | 18.84047328     | 3.52E-07    |
| AR, IL6, CD40, TGFB1, CD40LG, IL1B, CAT, TNF | 22.15011212     | 7.84E-07    |
| CCNB1, MDM2, HMOX1, AKT1, PTGS2, HIF1A, 5    | 27.61842105     | 1.46E-06    |
| JUN, CXCL8, EGF, MMP2, SERPINE1, HMOX1, C    | 14.53166549     | 4.42E-06    |
| TGFB1, EGF, EGFR, IL2, RELA, VEGFA, CXCL10   | 8.850538363     | 4.74E-06    |
| IL6, MAPK8, TGFB1, HMOX1, AKT1, NGF, PTGS    | 9.819883041     | 9.06E-04    |
| IL4, JUN, STAT1, FOS, BCL2L1, MCL1           | 33.99190283     | 0.001203234 |
| JUN, BDNF, HMOX1, CCL2, APOE, NGF, BCL2L1    | 15.6225412      | 0.007493541 |
| JUN, STAT1, CASP3, CAT, HMOX1                | 28.88200894     | 0.036779447 |
| HMOX1, AKT1, APOE, PTGS2, MPO, EGFR          | 16.06889952     | 0.04777968  |
| TGFB1, AKT1, MAPK14, VEGFA                   | 62.02031394     | 0.048571195 |
| CXCL10, JUN, CD40, NOS2, PLA2, TNF, TNFRSF   | 11.14689426     | 0.05017187  |
| CXCL8, IL1B, SERPINE1, HMOX1, HIF1A, VEGF    | 15.37025172     | 0.058821308 |
| IL6, TGFB1, MYC, EGFR, VEGFA                 | 24.5497076      | 0.069015142 |
| VCAM1, AKT1, MAPK14, VEGFA                   | 51.23417239     | 0.086200355 |
| IL4, TGFB1, TNF                              | 220.9473684     | 0.094380335 |
| JUN, CCL2, AKT1, HIF1A, VEGFA                | 21.34757183     | 0.116613151 |
| SERPINE1, CCL2, EGFR, IL2, TNFRSF1A          | 20.17784186     | 0.143220834 |
| IL10, IL4, SERPINE1, ICAM1                   | 42.08521303     | 0.151930483 |
| AKT1, PTGS2, EGFR, ICAM1                     | 36.8245614      | 0.218985901 |
| CASP8, CASP3, PPARG, NGF, TNF                | 17.74677658     | 0.22478281  |
| CD40, CASP8, HMOX1, TNF, RELA, TNFRSF1A      | 10.97875123     | 0.257522196 |
| CRP, TGFB1, EGFR                             | 98.19883041     | 0.444877291 |
| CASP9, JUN, CASP3, TP53                      | 27.40432477     | 0.450785754 |
| IL6, CD40, CD40LG, MAPK1, AKT1               | 12.8085431      | 0.587425322 |
| CXCL10, SERPINE1, CCL2                       | 55.23684211     | 0.855366298 |
| IL1B, HIF1A, VEGFA                           | 55.23684211     | 0.855366298 |
| NFKBIA, IKBKB, GSK3B, HSPA5, PTEN, CDK1, I   | 8.825226947     | 2.52E-04    |
| IL1A, NOS3, KDR, HSPB1, F3, NFE2L2           | 19.04574669     | 0.012873202 |
| HSP90AA1, HSPB2, HSPB1, HSPB3                | 34.76604555     | 0.167630009 |
| HSP90AA1, NOS3, CAV1                         | 42.12040134     | 0.877133439 |
| PARP1, IRF1, AHR, NR3C1, ESR1, RUNX2, NFE2   | 4.981100093     | 0.893367212 |
| IKBKB, IL1A, SELE, AGER, CXCL2, NFE2L2       | 5.779052426     | 0.958396169 |
| RB1, APP, CASP7                              | 33.18577075     | 0.965547778 |
| CCND1, HSPA5, NFE2L2                         | 24.33623188     | 0.997964688 |
| ADAM17, CAV1, RAF1, AGER                     | 8.489383215     | 0.999972791 |
| XIAP, SELE, ESR1                             | 17.38302277     | 0.999993165 |
| ADAM17, HSPA5, CAV1                          | 17.11141304     | 0.999995256 |
| KDR, HSPB1                                   | 146.0173913     | 0.999997317 |
| HSPB1, MET                                   | 146.0173913     | 0.999997317 |

|                                          |             |             |
|------------------------------------------|-------------|-------------|
| NCF1, NOS3, NFE2L2                       | 14.22247318 | 0.999999974 |
| IL1A, AGER                               | 104.2981366 | 0.999999984 |
| CAV1, NFE2L2                             | 91.26086957 | 0.999999999 |
| CCNA2, PTEN, NFE2L2                      | 11.4076087  | 1           |
| HSPB1, NFE2L2                            | 52.14906832 | 1           |
| HSPB1, NFE2L2                            | 38.42562929 | 1           |
| KDR, NFE2L2                              | 26.07453416 | 1           |
| GJA1, CAV1                               | 25.17541229 | 1           |
| NOS3, PTEN                               | 25.17541229 | 1           |
| CHRM2, ADRA2C, ADRA2B, ADRA2A            | 262.375     | 9.17E-05    |
| DRD2, ADRA2C, ADRA2B, ADRA2A             | 220.9473684 | 1.58E-04    |
| ADRA2C, ADRA2B, ADRA2A                   | 787.125     | 0.001275948 |
| ADRA2C, ADRA2B, ADRA2A                   | 787.125     | 0.001275948 |
| ADRA2C, ADRA2B, ADRA2A                   | 787.125     | 0.001275948 |
| CHRM2, OPRD1, CXCL11, PTGER3, HTR1A, ADI | 9.339265851 | 0.001550799 |
| CHRM2, OPRD1, HTR1B, OPRM1               | 91.26086957 | 0.002443574 |
| ADRA2C, ADRA2B, ADRA2A                   | 449.7857143 | 0.004451839 |
| OPRD1, PTGER3, HTR1B, OPRM1              | 63.60606061 | 0.007269939 |
| ADRA2C, ADRA2B, ADRA2A                   | 157.425     | 0.039307568 |
| OPRD1, HTR1A, HTR1B, OPRM1               | 17.49166667 | 0.281517306 |
| HTR1A, HTR1B                             | 699.6666667 | 0.535514349 |
| OPRD1, GAL, OPRM1                        | 31.17326733 | 0.640843074 |
| ADRA2C, ADRA2B, ADRA2A                   | 27.37826087 | 0.732944289 |
| HTR1B, DRD2                              | 233.2222222 | 0.899829862 |
| HTR1A, HTR1B                             | 233.2222222 | 0.899829862 |
| CHRM2, GAL, APOB                         | 10.97038328 | 0.999524353 |
| CHRM2, CHRM4                             | 56.72972973 | 0.999922644 |
| ADRA1D, ADRA1B, ADRA1A                   | 599.7142857 | 0.002918842 |
| CHRM3, CHRM1, CHRM5, HTR3A               | 86.44530245 | 0.003952586 |
| CHRM3, CHRM1, CHRM5, CYP1A1, ADRA1D, A   | 13.10850898 | 0.020302666 |
| PPP3CA, GRIN1, SNCA                      | 85.67346939 | 0.165622518 |
| MAOB, MAOA                               | 199.9047619 | 0.968318973 |
| PPP3CA, HRH1                             | 94.07282913 | 0.999349356 |
| GRIN1, SNCA                              | 88.84656085 | 0.999577533 |
| MAOB, MAOA, CYP1A1, SNCA                 | 5.402831403 | 0.999991703 |
| HTR2C, HTR2A, GRIN1                      | 9.995238095 | 0.999993925 |
| GCLC, GSS, GCLM                          | 393.5625    | 0.002296881 |
| GSTM2, GSTM1, GSTP1                      | 286.2272727 | 0.004411586 |
| GCLC, GSTP1, GCLM                        | 165.7105263 | 0.013323649 |
| GSTM2, GSTM1, GSTP1                      | 112.4464286 | 0.028855502 |
| GCLC, GCLM                               | 2099        | 0.101992485 |
| GCLC, GSS, GCLM                          | 57.24545455 | 0.106672395 |
| GCLC, GCLM                               | 1049.5      | 0.193592839 |

|                                     |             |             |
|-------------------------------------|-------------|-------------|
| GSTM2, GSTM1                        | 1049.5      | 0.193592839 |
| GCLC, GCLM                          | 1049.5      | 0.193592839 |
| GCLC, GSS, GCLM                     | 38.16363636 | 0.222711715 |
| GSTM2, GSTM1, GSTP1                 | 37.48214286 | 0.229773369 |
| GABRA6, GABRA3, GABRE, GABRG3       | 90.27956989 | 3.96E-04    |
| GABRA6, GABRA3, GABRG3              | 286.2272727 | 0.002396304 |
| GRIA2, GABRA6, GABRA3, GABRG3       | 39.98095238 | 0.004542204 |
| GRIA2, CLDN4, GABRA6, GABRE         | 7.231696813 | 0.481613899 |
| GABRA6, GABRG3                      | 104.95      | 0.689267851 |
| SNCB, MT3                           | 31.8030303  | 0.979094588 |
| GRIA2, SNCB                         | 17.49166667 | 0.999137033 |
| GRIN2A, CHRNA4, CRH, SLC6A2, SLC6A4 | 38.87037037 | 4.87E-04    |
| SLC6A2, SLC6A3, SLC6A4              | 699.6666667 | 9.94E-04    |
| GRIN2A, CRH, SLC6A2, SLC6A3, SLC6A4 | 30.6871345  | 0.001245444 |
| GRIN2A, CRH, SLC6A3                 | 53.30793651 | 0.172630596 |
| SLC6A2, SLC6A3                      | 746.3111111 | 0.347240124 |
| SLC6A2, SLC6A3, SLC6A4              | 22.93989071 | 0.631233037 |
| CHAT, SLC6A3                        | 310.962963  | 0.640817187 |
| CRH, SLC6A2                         | 219.503268  | 0.765611406 |
| CRH, CALM1                          | 207.308642  | 0.784794172 |
| GRIN2A, CALM1                       | 120.3727599 | 0.929110665 |
| GRIN2A, CRH                         | 103.654321  | 0.953762791 |
| CHRNA4, SLC6A3                      | 100.8528529 | 0.957551035 |
| GRIN2A, CRH                         | 98.19883041 | 0.961029104 |
| GRIN2A, CHRNA4                      | 71.76068376 | 0.988231166 |
| GRIN2A, SLC6A4                      | 60.18637993 | 0.994999269 |
| CHRNA4, SLC6A3                      | 44.42328042 | 0.99924053  |
| CHRNA4, SLC6A4                      | 21.69509044 | 0.999999606 |
| ADRB1, DRD1, ADRB2, DRD5            | 209.9       | 8.10E-05    |
| DRD1, ADRB2, DRD5                   | 125.94      | 0.033062621 |
| DRD1, DRD5                          | 2099        | 0.143679704 |
| ADRB1, ADRB2                        | 1399.333333 | 0.207587448 |
| ADRB1, ADRB2                        | 1399.333333 | 0.207587448 |
| DRD1, DRD5                          | 599.7142857 | 0.418979157 |
| ADRB1, ADRB2                        | 466.4444444 | 0.502492252 |
| DRD1, DRD5                          | 466.4444444 | 0.502492252 |
| DRD1, DRD5                          | 419.8       | 0.539636476 |
| ADRB1, ADRB2                        | 349.8333333 | 0.605817815 |
| DRD1, DRD5                          | 349.8333333 | 0.605817815 |
| DRD1, DRD5                          | 322.9230769 | 0.635252753 |
| DRD1, DRD5                          | 262.375     | 0.711021816 |
| ADRB1, DRD1                         | 220.9473684 | 0.771060883 |
| ADRB1, ADRB2                        | 220.9473684 | 0.771060883 |



|                                |             |             |
|--------------------------------|-------------|-------------|
| DRD1, DRD5                     | 209.9       | 0.788163416 |
| PRKCB, PRKCD                   | 144.7586207 | 0.894697399 |
| DRD1, DRD5                     | 135.4193548 | 0.909851446 |
| ADRB1, ADRB2                   | 131.1875    | 0.916590488 |
| ADRB1, ADRB2                   | 116.6111111 | 0.938874461 |
| ADRB1, DRD1                    | 104.95      | 0.955208296 |
| DRD1, DRD5                     | 73.64912281 | 0.988060645 |
| ACHE, DRD1                     | 68.81967213 | 0.991254467 |
| PRKCB, DRD5                    | 45.13978495 | 0.999277123 |
| PRKCB, PRKCD                   | 36.50434783 | 0.999870136 |
| PRKCB, PRKCD                   | 33.584      | 0.999940535 |
| GRIN2B, DRD5                   | 17.49166667 | 0.999999993 |
| BCL2, PSEN1                    | 279.8666667 | 0.78409962  |
| BCL2, PSEN1                    | 262.375     | 0.805083262 |
| BACE1, PSEN1                   | 190.8181818 | 0.894471953 |
| BCL2, PSEN1                    | 127.2121212 | 0.965757047 |
| BCL2, PSEN1, SQSTM1            | 13.83956044 | 0.968828286 |
| MAPT, PSEN1                    | 39.98095238 | 0.999978756 |
| SULT1E1, NR1I2, AKR1C3, CYP1B1 | 312.4093023 | 5.62E-06    |
| AKR1C1, AKR1C3, CYP1B1         | 839.6       | 2.53E-04    |
| SULT1E1, CYP1B1                | 610.6181818 | 0.210160045 |
| AKR1C1, AKR1C3, CYP1B1         | 17.01891892 | 0.473431333 |
| AKR1C3, CYP1B1                 | 223.8933333 | 0.474705482 |
| AKR1C1, AKR1C3                 | 110.1114754 | 0.730251162 |
| THBD, PLAT, F2                 | 91.26086957 | 0.005241166 |
| THBD, F2                       | 1399.333333 | 0.041068816 |
| THBD, F2                       | 1119.466667 | 0.05107269  |
| PLAT, F2                       | 533.0793651 | 0.104277443 |
| F7, F10                        | 2238.933333 | 0.017124888 |
| F7, F10                        | 1017.69697  | 0.037294631 |
| F7, F10                        | 447.7866667 | 0.082788841 |
| F7, F10                        | 133.2698413 | 0.25239085  |
| F7, F10                        | 69.96666667 | 0.426105943 |
| F7, F10                        | 60.84057971 | 0.472215655 |
| F7, F10                        | 60.84057971 | 0.472215655 |
| NQO1, SOD1                     | 466.4444444 | 0.337083232 |
| S100B, GFAP                    | 147.2982456 | 0.728242393 |
| NQO1, MBP                      | 65.85098039 | 0.945977373 |
| NQO1, SOD1                     | 53.30793651 | 0.972871797 |
| MBP, S100B                     | 46.64444444 | 0.983825919 |
| MBP, SOD1                      | 42.08521303 | 0.98967235  |

|             |             |             |
|-------------|-------------|-------------|
| NQO1, SOD1  | 33.92323232 | 0.996581774 |
| S100B, SOD1 | 18.65777778 | 0.999968542 |
