# Supplementary material for: Systems Biology and Chemoinformatics‐Based Strategies to Explore the Biological Mechanism of Fugui Wenyang Decoction in Treating Vascular Dementia Rats
Source: Hindawi journal article supplement (doi:10.1155/2021/6693955), 2021-01-01
Supplement: f6 [file 6693955.f6.pdf]

**Table S6 Bioinformatics Analysis of Differential expression protein-other rat protein PPI network**

| Category           | Term       | Description  | Count | %           | PValue      | Genes      |
|--------------------|------------|--------------|-------|-------------|-------------|------------|
| Biological process | GO:0016226 | iron-sulfur  | 9     | 2.093023256 | 6.14E-10    | ISCA1, NIS |
|                    | GO:0033173 | calcineurin  | 6     | 1.395348837 | 1.22E-06    | PPP3CA, I  |
|                    | GO:0006096 | glycolytic   | 8     | 1.860465116 | 2.12E-05    | TPI1, PGK  |
|                    | GO:0036120 | cellular res | 7     | 1.627906977 | 3.59E-05    | ERRFI1, C  |
|                    | GO:0060831 | smoothene    | 4     | 0.930232558 | 3.58E-04    | TBC1D32,   |
|                    | GO:0021775 | smoothene    | 3     | 0.697674419 | 0.001458457 | SUFU, GL   |
|                    | GO:0061028 | establishm   | 4     | 0.930232558 | 0.004929044 | RDX, MSI   |
|                    | GO:0051000 | positive re  | 4     | 0.930232558 | 0.006949965 | AKT1, CA   |
|                    | GO:0032981 | mitochond    | 4     | 0.930232558 | 0.00811872  | NDUFS7,    |
|                    | GO:0070527 | platelet ag  | 5     | 1.162790698 | 0.012758824 | ILK, MYH   |
|                    | GO:0032543 | mitochond    | 4     | 0.930232558 | 0.021506217 | MRPL2, M   |
|                    | GO:0071456 | cellular res | 8     | 1.860465116 | 0.033599178 | BRIP1, SR  |
|                    | GO:0070997 | neuron dea   | 3     | 0.697674419 | 0.04279974  | LRRK2, C   |
|                    | GO:0014829 | vascular sr  | 2     | 0.465116279 | 0.065254319 | ACTA2, R   |
|                    | rno04921   | Oxytocin s   | 27    | 6.279069767 | 8.90E-13    | MYLK2, F   |
|                    | rno04022   | cGMP-PK      | 27    | 6.279069767 | 4.10E-12    | MYLK2, F   |
| Signaling pathway  | rno04728   | Dopamine     | 21    | 4.88372093  | 2.61E-09    | CALML3,    |
|                    | rno04713   | Circadian c  | 16    | 3.720930233 | 2.83E-07    | CALML3,    |
|                    | rno04922   | Glucagon s   | 16    | 3.720930233 | 4.26E-07    | CRTC2, P   |
|                    | rno04611   | Platelet act | 18    | 4.186046512 | 9.30E-07    | MYLK2, F   |
|                    | rno04662   | B cell rece  | 13    | 3.023255814 | 1.24E-06    | CD72, NF   |
|                    | rno04915   | Estrogen si  | 15    | 3.488372093 | 1.48E-06    | NOS3, SR   |
|                    | rno04725   | Cholinergi   | 16    | 3.720930233 | 1.88E-06    | GNAI1, G   |
|                    | rno04370   | VEGF sign    | 12    | 2.790697674 | 2.03E-06    | PPP3CA, I  |
|                    | rno04724   | Glutamate    | 16    | 3.720930233 | 2.65E-06    | GNAI1, G   |
|                    | rno04024   | cAMP sign    | 21    | 4.88372093  | 2.75E-06    | PPP1R12A   |
|                    | rno04660   | T cell rece  | 15    | 3.488372093 | 4.41E-06    | IL10, NFA  |
|                    | rno05014   | Amyotroph    | 10    | 2.325581395 | 4.56E-05    | MAP2K3,    |
|                    | rno04071   | Sphingolip   | 14    | 3.255813953 | 1.28E-04    | ROCK2, N   |
|                    | rno04360   | Axon guid    | 14    | 3.255813953 | 1.76E-04    | ROCK2, N   |
|                    | rno04020   | Calcium si   | 17    | 3.953488372 | 2.17E-04    | MYLK2, N   |
|                    | rno04650   | Natural kil  | 12    | 2.790697674 | 2.32E-04    | PPP3CA, I  |
|                    | rno04670   | Leukocyte    | 13    | 3.023255814 | 2.85E-04    | VCAM1, F   |
|                    | rno04270   | Vascular sr  | 13    | 3.023255814 | 4.21E-04    | MYLK2, F   |
|                    | rno04015   | Rap1 signa   | 18    | 4.186046512 | 4.25E-04    | MAP2K3,    |
|                    | rno05010   | Alzheimer'   | 16    | 3.720930233 | 5.71E-04    | NDUFA8,    |
|                    | rno05214   | Glioma       | 9     | 2.093023256 | 8.97E-04    | AKT2, AK   |
|                    | rno04120   | Ubiquitin r  | 13    | 3.023255814 | 0.001436918 | UBE3C, F   |
|                    | rno04727   | GABAergi     | 10    | 2.325581395 | 0.001538547 | GNAO1, C   |
|                    | rno04722   | Neurotropl   | 12    | 2.790697674 | 0.001943351 | AKT2, TR   |
|                    | rno04062   | Chemokine    | 14    | 3.255813953 | 0.003670207 | ROCK2, S   |
|                    | rno04310   | Wnt signal   | 12    | 2.790697674 | 0.004664415 | PPP3CA, I  |
|                    | rno04010   | MAPK sig     | 17    | 3.953488372 | 0.006825934 | MAP2K3,    |
|                    | rno04726   | Serotonerg   | 10    | 2.325581395 | 0.015709317 | GNAO1, C   |
|                    | rno04668   | TNF signa    | 9     | 2.093023256 | 0.020875481 | MAP2K3,    |

**etwork****Fold Enri Bonferroni**

|          |          |
|----------|----------|
| 25.22618 | 1.41E-06 |
| 26.90793 | 0.00279  |
| 9.199292 | 0.047475 |
| 10.82503 | 0.078882 |
| 25.6266  | 0.559241 |
| 44.84655 | 0.964696 |
| 11.21164 | 0.999988 |
| 9.965899 | 1        |
| 9.441378 | 1        |
| 5.469091 | 1        |
| 6.643933 | 1        |
| 2.618776 | 1        |
| 8.969309 | 1        |
| 29.8977  | 1        |

|          |          |
|----------|----------|
| 5.641259 | 1.90E-10 |
| 5.293033 | 8.73E-10 |
| 5.169939 | 5.57E-07 |
| 5.238465 | 6.02E-05 |
| 5.081311 | 9.06E-05 |
| 4.234426 | 1.98E-04 |
| 5.983428 | 2.65E-04 |
| 4.962218 | 3.15E-04 |
| 4.536885 | 4.01E-04 |
| 6.351639 | 4.31E-04 |
| 4.418532 | 5.63E-04 |
| 3.420113 | 5.85E-04 |
| 4.536885 | 9.39E-04 |
| 5.774218 | 0.009661 |
| 3.585603 | 0.026859 |
| 3.473553 | 0.036895 |
| 2.918321 | 0.045194 |
| 3.888759 | 0.048119 |
| 3.528689 | 0.058965 |
| 3.38407  | 0.085738 |
| 2.646516 | 0.086555 |
| 2.791929 | 0.114587 |
| 4.397289 | 0.174015 |
| 2.948975 | 0.263822 |
| 3.650367 | 0.27961  |
| 3.02459  | 0.339221 |
| 2.511948 | 0.543055 |
| 2.702825 | 0.630589 |
| 2.100737 | 0.76751  |
| 2.561145 | 0.965701 |
| 2.622236 | 0.988819 |
