# Supplementary material for: Systems Biology and Chemoinformatics‐Based Strategies to Explore the Biological Mechanism of Fugui Wenyang Decoction in Treating Vascular Dementia Rats
Source: Hindawi journal article supplement (doi:10.1155/2021/6693955), 2021-01-01
Supplement: f7 [file 6693955.f7.pdf]

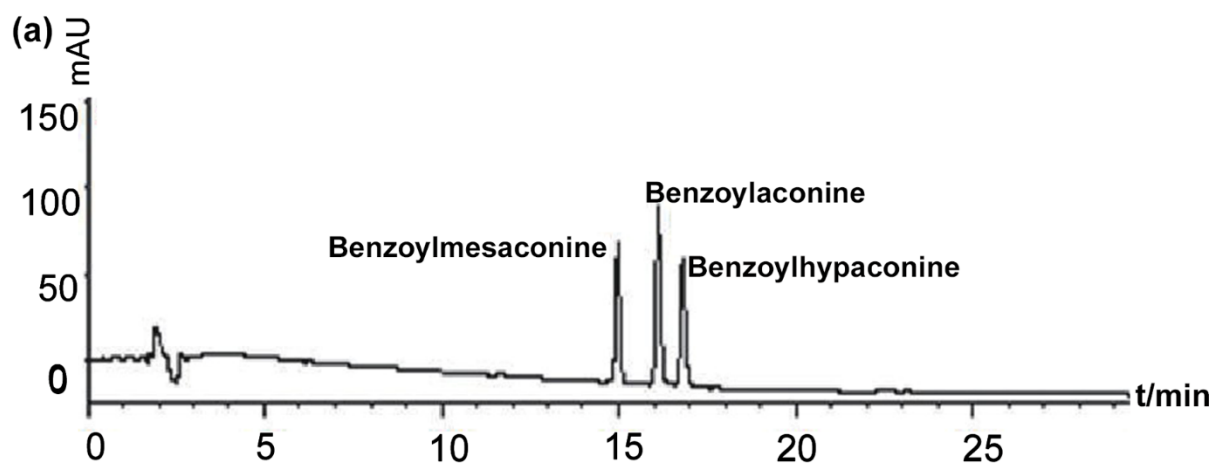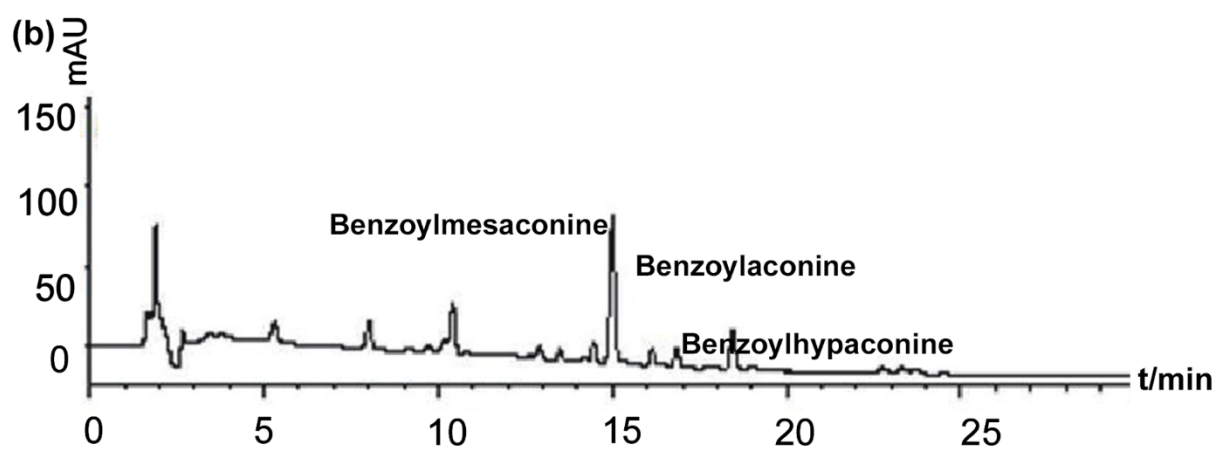

Figure S1 The results of HPLC (a: reference solution; b: FGWYD solution)
